# Supplementary material for: Stability of an ophthalmic formulation of polyhexamethylene biguanide in gamma-sterilized and ethylene oxide sterilized low density polyethylene multidose eyedroppers
Source: PeerJ. 2018 Apr 18;6:e4549. doi: 10.7717/peerj.4549 (PMC5910790; doi:10.7717/peerj.4549)
Supplement: Supplemental Information 3 [file peerj-06-4549-s003.xlsx]

## Sheet: Osmolality
Gamma sterilized LDPE bottles 5°C
Day	0	4	8	15	30	60	90
OSM1	258	260	262	258	261	261	259
OSM2	258	261	260	259	261	261	260
OSM3	257	260	261	257	258	259	263
Mean	257.667	260.333	261	258	260	260.333	260.667
SD	0.57735	0.57735	1	1	1.73205	1.1547	2.08167
Ethylene oxide sterilized LDPE bottles at 5°C
Day	0	4	8	15	30	60	90
OSM1	258	259	259	255	266	261	260
OSM2	257	261	258	258	259	259	258
OSM3	258	261	260	258	259	259	263
Mean	257.667	260.333	259	257	261.333	259.667	260.333
SD	0.57735	1.1547	1	1.73205	4.04145	1.1547	2.51661
Gamma sterilized LDPE bottles 25°C
Day	0	4	8	15	30	60	90
OSM1	258	261	260	256	262	260	264
OSM2	258	259	261	258	262	261	258
OSM3	257	259	260	258	261	260	262
Mean	257.667	259.667	260.333	257.333	261.667	260.333	261.333
SD	0.57735	1.1547	0.57735	1.1547	0.57735	0.57735	3.05505
Ethylene oxide sterilized LDPE bottles at 25°C
Day	0	4	8	15	30	60	90
OSM1	258	260	256	259	263	259	259
OSM2	257	261	259	258	261	260	263
OSM3	258	259	258	256	262	260	261
Mean	257.667	260	257.667	257.667	262	259.667	261
SD	0.57735	1	1.52753	1.52753	1	0.57735	2
