# Supplementary material for: Stability of an ophthalmic formulation of polyhexamethylene biguanide in gamma-sterilized and ethylene oxide sterilized low density polyethylene multidose eyedroppers
Source: PeerJ. 2018 Apr 18;6:e4549. doi: 10.7717/peerj.4549 (PMC5910790; doi:10.7717/peerj.4549)
Supplement: Supplemental Information 4 [file peerj-06-4549-s004.xlsx]

## Sheet: pH
Gamma sterilized LDPE bottles 5°C
Day	0	4	8	15	30	60	90
pH 1	5.97	5.89	5.31	5.04	5.23	4.78	4.67
pH 2	6.3	6.02	5.62	5.06	4.74	4.65	4.63
pH 3	6.21	5.94	5.26	4.95	4.88	4.74	4.51
Mean pH	6.16	5.95	5.39667	5.01667	4.95	4.72333	4.60333
SD	0.170587	0.0655744	0.195021	0.0585947	0.252389	0.0665833	0.0832666
Ethylene oxide sterilized LDPE bottles at 5°C
Day	0	4	8	15	30	60	90
pH 1	6.39	6.42	6.51	6.65	7.13	6.62	6.52
pH 2	6.22	6.26	6.53	6.17	6.93	6.57	6.42
pH 3	6.2	6.35	6.47	6.23	6.63	6.65	6.3
Mean pH	6.27	6.34333	6.50333	6.35	6.89667	6.61333	6.41333
SD	0.104403	0.0802081	0.0305505	0.261534	0.251661	0.0404145	0.110151
Gamma sterilized LDPE bottles 25°C
Day	0	4	8	15	30	60	90
pH 1	5.97	5.81	4.58	4.34	4.16	4.32	4.01
pH 2	6.3	5.86	4.8	4.43	4.28	4.41	4.03
pH 3	6.21	5.9	4.29	4.19	4.26	4.28	3.96
Mean pH	6.16	5.85667	4.55667	4.32	4.23333	4.33667	4
SD	0.170587	0.0450925	0.255799	0.121244	0.064291	0.0665833	0.0360555
Ethylene oxide sterilized LDPE bottles at 25°C
Day	0	4	8	15	30	60	90
pH 1	6.39	6.51	6.58	6.45	6	6.49	6.62
pH 2	6.22	6.58	6.63	6.44	6.46	6.54	6.51
pH 3	6.2	6.48	6.64	6.42	6.6	6.56	6.43
Mean pH	6.27	6.52333	6.61667	6.43667	6.35333	6.53	6.52
SD	0.104403	0.051316	0.0321455	0.0152753	0.3139	0.0360555	0.0953939
