# Supplementary material for: Stability of an ophthalmic formulation of polyhexamethylene biguanide in gamma-sterilized and ethylene oxide sterilized low density polyethylene multidose eyedroppers
Source: PeerJ. 2018 Apr 18;6:e4549. doi: 10.7717/peerj.4549 (PMC5910790; doi:10.7717/peerj.4549)
Supplement: Supplemental Information 5 [file peerj-06-4549-s005.xlsx]

## Sheet: Feuil1
	Non colored non sterilized PP
Day	0	4	8	14	30
ph1	5.88	6.12	6.03	6.04	6.09
ph2	5.96	6.04	6.11	6.04	6.05
ph3	6.01	6.02	6.13	6.07	6.04
Mean	5.95	6.06	6.09	6.05	6.06
SD	0.0655744	0.052915	0.052915	0.0173205	0.0264575
	Non colored non sterilized LDPE
Day	0	4	8	14	30
ph1	5.95	5.96	5.94	6.05	6.09
ph2	5.99	6.03	6.01	6	6.03
ph3	6	5.92	5.93	6.07	6.09
Mean	5.98	5.97	5.96	6.04	6.07
SD	0.0264575	0.0556776	0.043589	0.0360555	0.034641
	Colored non-sterilized LDPE
Day	0	4	8	14	30
ph1	6.1	6.12	6.19	6.26	6.09
ph2	6.09	6.21	6.09	6	6.03
ph3	6.14	6.24	6.08	6.19	6.09
Mean	6.11	6.19	6.12	6.15	6.07
SD	0.0264575	0.06245	0.0608276	0.134536	0.034641
	Colored gamma sterilized LDPE
Day	0	4	8	14	30
ph1	6.19	4.68	4.33	4.23	4.08
ph2	6.15	4.75	4.21	4.13	4.09
ph3	6.2	4.76	4.18	4.12	4.07
Mean	6.18	4.73	4.24	4.16	4.08
SD	0.0264575	0.043589	0.0793725	0.0608276	0.01
